# Supplementary material for: Renal osteodystrophy in Egyptian CKD patients: observations from clinically indicated bone biopsies
Source: BMC Nephrol. 2026 Feb 20;27:147. doi: 10.1186/s12882-026-04776-6 (PMC12937528; doi:10.1186/s12882-026-04776-6)
Supplement: Supplementary file 1 — Supplementary Material 1 [file 12882_2026_4776_MOESM1_ESM.xlsx]

## Sheet: markers values 
variable	Ca		Po4		iPTH		S. ALB		25 OH Vit D		Total ALP		Klotho		FGF-23		Sclerostin		BsAP		TRAP5b		S. AL
Groups (significant bone AL)	AL-	AL+	AL-	AL+	AL-	AL+	AL-	AL+	AL-	AL+	AL-	AL+	AL-	AL+	AL-	AL+	AL-	AL+	AL-	AL+	AL-	AL+	AL-	AL+
Values	9.04	7.6	5.2	5.2	365	430	3.2	5	8.1	45	595	396	0.109	0.251	535.5	2531.1	1.96	4.59	33.425	4.7909	3.039	2.1	0	19.9
	9.5	8.3	2.26	3.6	129	221	4.5	4.2	23	23	270	812	0.712	0.17	926.3	3092.1	1.101	2.688	183.47	115.04	13.384	4.224	16.99	12.31
	7.6	6.4	4.4	7.2	441	233	4.1	4.2	29	13	411	244	0.099	0.232	1106.4	1674.4	1.132	2.173	5.9418	9.1551	4.074	4.466	0	22.65
	10.3	9.9	3.5	4.2	232	191	3.5	4.5	27	16	844	189	0.215	0.987	2581.8	1271.2	2.902	11.024	299.999	3.0272	13.525	3.049	16.64	17.02
	8.94	8.4	6.2	3.7	277	302	3.7	3	22	9	1350	694	0.962	0.21	2445	3007.4	2.495	2.357	16.109	7.4925	10.664	2.965	9.82	14.41
	7.5	8.3	6.7	3.1	118	135	4.2	4.5	18	45	181	458	0.243	0.353	1086.1	2721.1	6.559	1.442	1.9092	16.73	1.327	8.329	0
		8.18		5.6		149		3.9		9		187
		11		3.6		180		3.9				264
Mean	8.81333	8.51	4.71	4.525	260.333	230.125	3.86667	4.15	21.1833	22.8571	608.5	405.5	0.39	0.367167	1446.85	2382.88	2.6915	4.04567	90.1423	26.0393	7.66883	4.18883	7.24167	17.258
Median	8.99	8.3	4.8	3.95	254.5	206	3.9	4.2	22.5	16	503	330	0.229	0.2415	1096.25	2626.1	2.2275	2.5225	24.767	8.3238	7.369	3.6365	4.91	17.02
SD	1.09052	1.39497	1.6723	1.37815	128.206	96.2741	0.484424	0.587975	7.4861	15.858	434.007	236.655	0.359651	0.309753	852.29	743.93	2.02669	3.57699	123.55	43.8586	5.48645	2.20813	8.33465	4.1444
IQR	1.45	0.74	2.22	1.7	188.25	78	0.62	0.6	7	23	476.5	286.75	0.459	0.112	1144.1	1047.2	1.461	1.895	137.475	9.37	9.603	1.946	14.94	5.49
U	20.5		22.5		22		16		22.5		31		15		5		13		23		12		4
p value	0.6979		0.897		0.85		0.328		0.885		0.41		0.699		0.041		0.4848		0.4848		0.24		0.052
